# Supplementary material
Source: PubMed Central journal article supplement (PMC5331208)

Fig 1

B

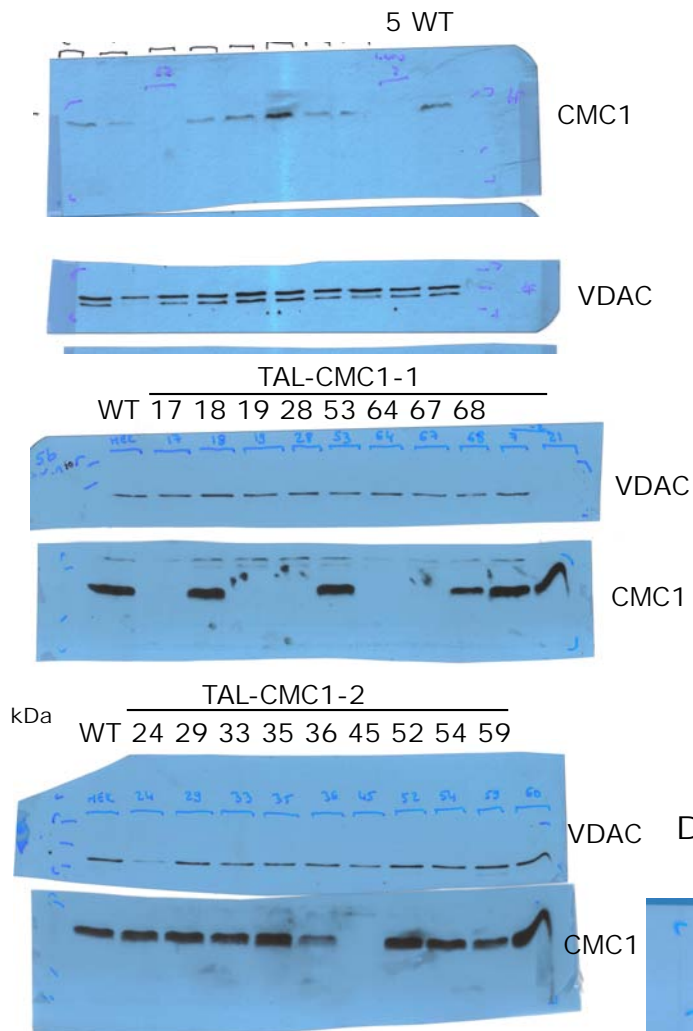

C

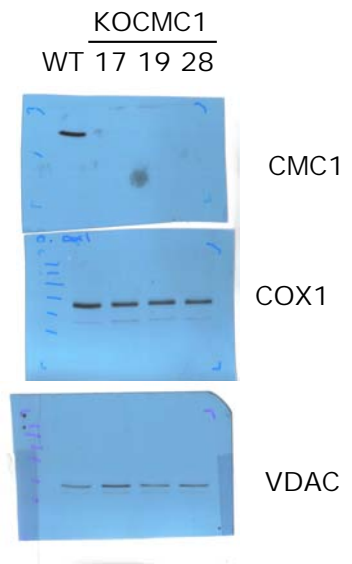

D

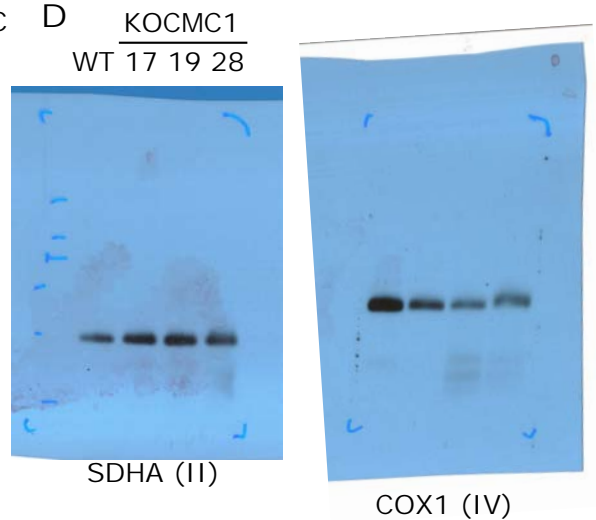

Fig 1

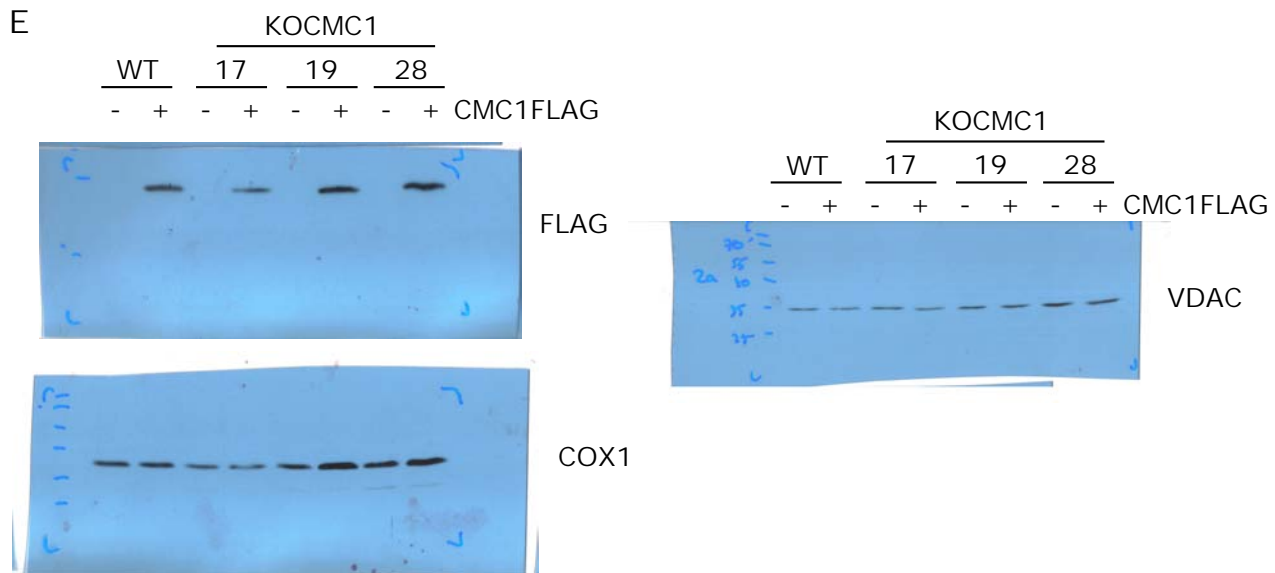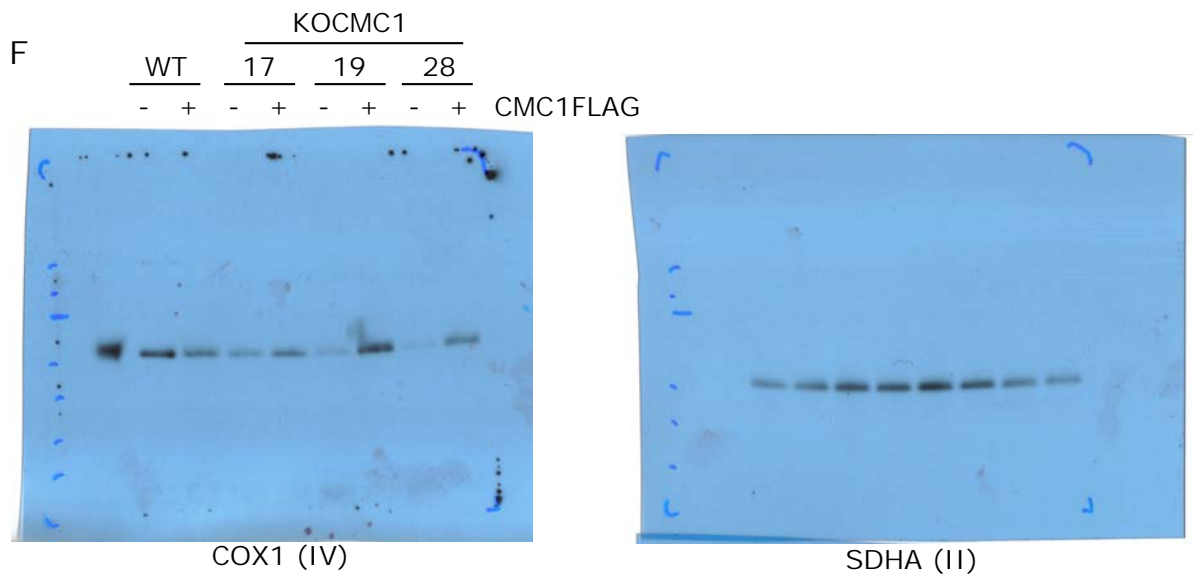

Supplement: EMBR-18-477-s001.pdf [file EMBR-18-477-s001.pdf]
